# Supplementary material
Source: HighWire-hosted journal article supplement (https://www.ajnr.org/highwire/filestream/96714/field_highwire_adjunct_files/0/0427.pdf)
Supplement: 0427.pdf [file 0427.pdf]

Online Supplemental Data

**Investigating Simultaneity for Deep Learning-enhanced Actual Ultra-low-dose Amyloid PET/MRI Imaging**

Kevin T. Chen<sup>1,2</sup>, Olalekan Adeyeri<sup>3</sup>, Tyler N. Toueg<sup>4</sup>, Michael Zeineh<sup>1</sup>, Elizabeth Mormino<sup>4</sup>, Mehdi Khalighi<sup>1</sup>, Greg Zaharchuk<sup>1</sup>

<sup>1</sup>Department of Radiology, Stanford University, Stanford, CA

<sup>2</sup>Department of Biomedical Engineering, National Taiwan University, Taipei, Taiwan

<sup>3</sup>Computer Science, Salem State University, Salem, MA, United States

<sup>4</sup>Department of Neurology and Neurological Sciences, Stanford University, Stanford, CA

Corresponding/first author: Kevin T. Chen; address: 49 Fanglan Road, Taipei 106, Taiwan; email: [chenkt@ntu.edu.tw](mailto:chenkt@ntu.edu.tw); tel: +886(960)603899 ORCID ID: 0000-0001-8556-5307

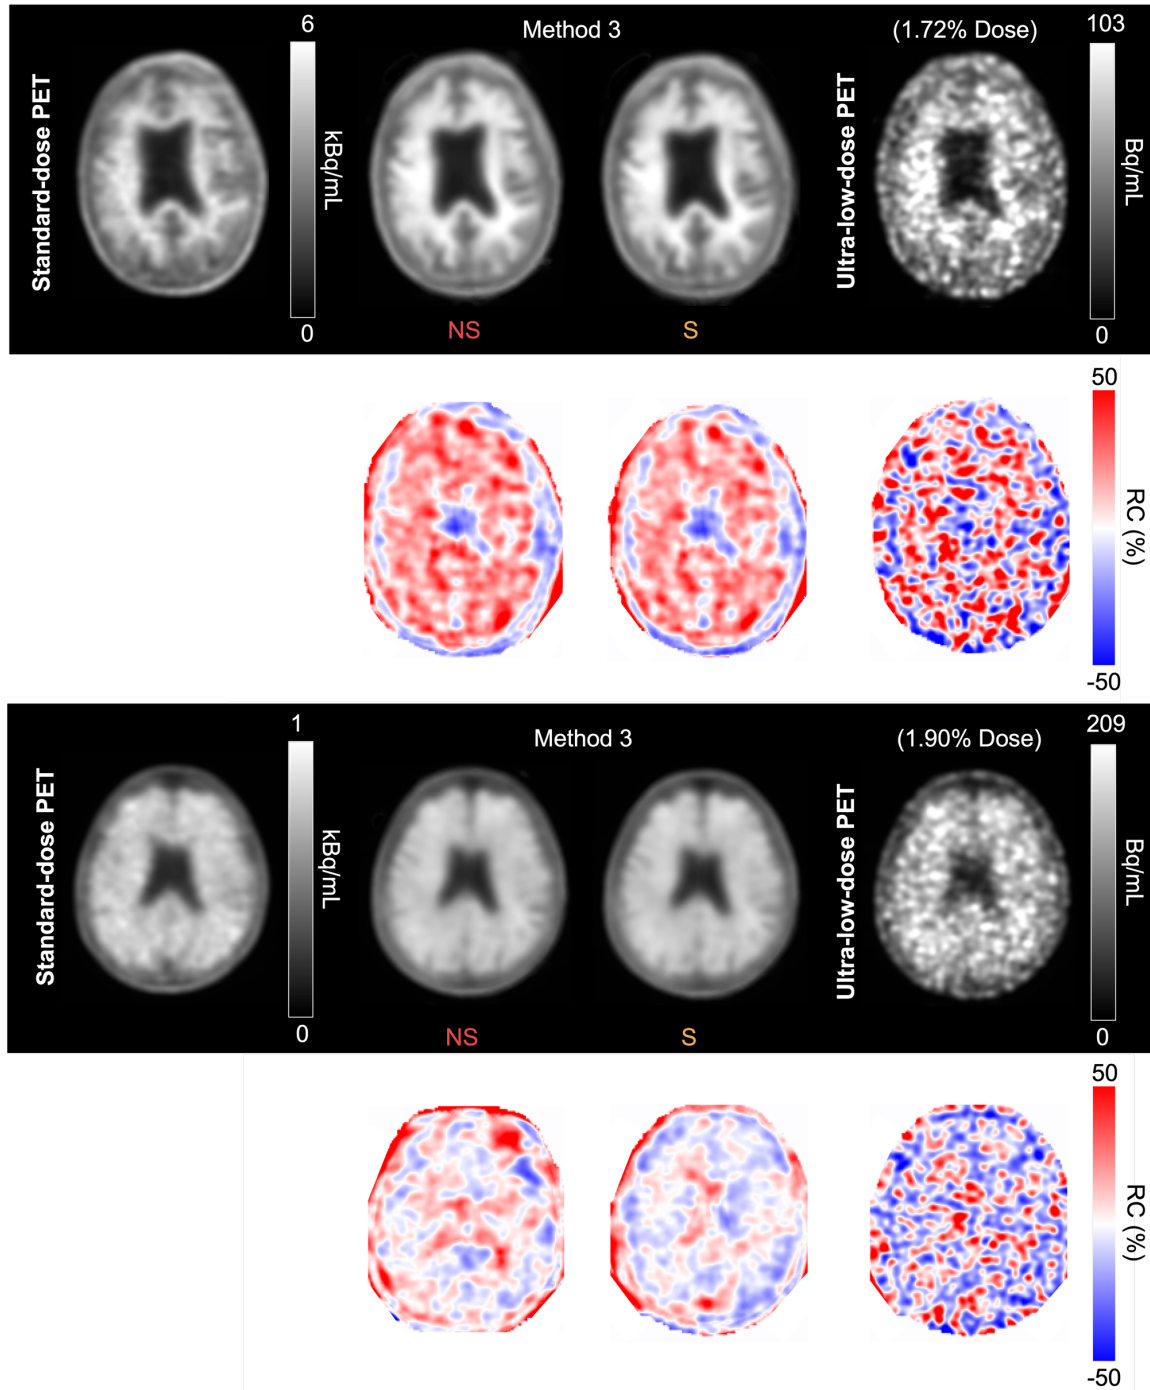

**Supplementary Figure.** Representative amyloid PET images (top: amyloid negative, bottom: amyloid positive) with their voxel-wise relative change (RC) maps, calculated using the standard-dose images as the reference. The enhanced images show a smaller RC range than the ultra-low-dose images.

**Supplementary Table.** Cerebral ROIs for derivation of the larger regions of interest. The larger regions were then used to calculate a composite “global” value of the association cortex.

| Region           | FreeSurfer region                                                                                                                                                                                                                                                                                                                                                                                                                                                                                          |
|------------------|------------------------------------------------------------------------------------------------------------------------------------------------------------------------------------------------------------------------------------------------------------------------------------------------------------------------------------------------------------------------------------------------------------------------------------------------------------------------------------------------------------|
| Parietal         | ctx-lh-precuneus<br>ctx-rh-precuneus<br>ctx-lh-inferiorparietal<br>ctx-rh-inferiorparietal<br>ctx-lh-superiorparietal<br>ctx-rh-superiorparietal<br>ctx-lh-supramarginal<br>ctx-rh-supramarginal                                                                                                                                                                                                                                                                                                           |
| Whole cerebellum | Right-Cerebellum-White-Matter<br>Right-Cerebellum-Cortex<br>Left-Cerebellum-White-Matter<br>Left-Cerebellum-Cortex                                                                                                                                                                                                                                                                                                                                                                                         |
| Lateral temporal | ctx-lh-middletemporal<br>ctx-rh-middletemporal<br>ctx-lh-superiortemporal<br>ctx-rh-superiortemporal                                                                                                                                                                                                                                                                                                                                                                                                       |
| Frontal          | ctx-lh-caudalmiddlefrontal<br>ctx-rh-caudalmiddlefrontal<br>ctx-lh-lateralorbitofrontal<br>ctx-rh-lateralorbitofrontal<br>ctx-lh-medialorbitofrontal<br>ctx-rh-medialorbitofrontal<br>ctx-lh-parsopercularis<br>ctx-lh-parsorbitalis<br>ctx-lh-parstriangularis<br>ctx-rh-parsopercularis<br>ctx-rh-parsorbitalis<br>ctx-rh-parstriangularis<br>ctx-lh-rostralmiddlefrontal<br>ctx-rh-rostralmiddlefrontal<br>ctx-lh-superiorfrontal<br>ctx-rh-superiorfrontal<br>ctx-lh-frontalpole<br>ctx-rh-frontalpole |
| Cingulate        | ctx-lh-isthmuscingulate<br>ctx-lh-posteriorcingulate<br>ctx-lh-rostralanteriorcingulate<br>ctx-rh-isthmuscingulate<br>ctx-rh-posteriorcingulate<br>ctx-rh-rostralanteriorcingulate<br>ctx-lh-caudalanteriorcingulate<br>ctx-rh-caudalanteriorcingulate                                                                                                                                                                                                                                                     |
